# Supplementary material
Source: HighWire-hosted journal article supplement (http://ajnr-stage2.highwire.org/highwire/filestream/52451/field_highwire_adjunct_files/0/3607_materials.pdf)
Supplement: 3607_materials.pdf [file 3607_materials.pdf]

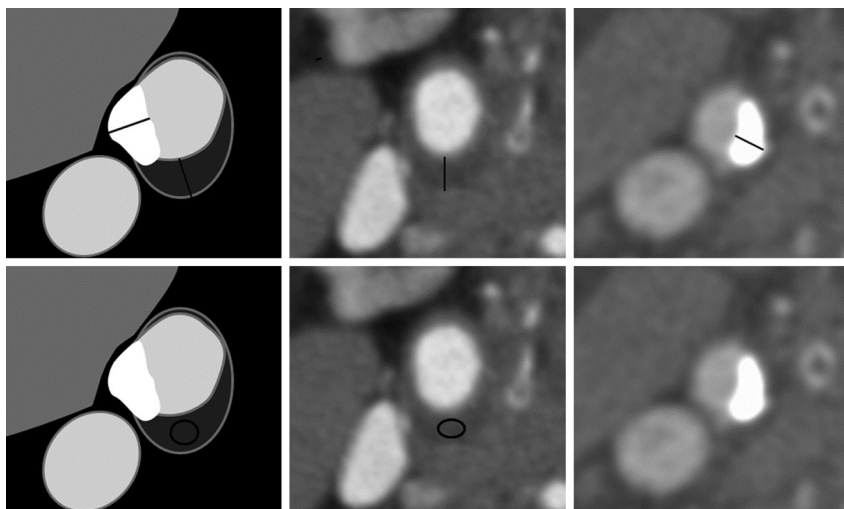

**ON-LINE FIGURE** Schematic drawing of how the maximum thickness values were obtained. First row from left to right, schematic diagram shows maximum hard plaque thickness and maximum soft plaque thickness measurement; CTA image shows maximum soft plaque thickness measurement; CTA image shows maximum hard plaque thickness measurement. Second-row schematic diagram shows ROI in soft plaque, CTA image shows region of interest in soft plaque; CTA image, no ROI was placed on calcified plaque.

**Online Table: CT protocols**

| Scanner Name                  | Aquilion            | BrightSpeed S              | Definition Edge           | Sensation 64                    | Somatom Definition Flash                              |
|-------------------------------|---------------------|----------------------------|---------------------------|---------------------------------|-------------------------------------------------------|
| No. of detectors              | 4                   | 16                         | 128                       | 64                              | 128                                                   |
| Collimation                   | 1.0 mm              | 0.625 mm                   | 0.6 mm                    | 0.6 mm                          | 0.6 mm                                                |
| Pitch                         | 1.0                 | 1.0                        | 1.7                       | 1.0                             | 0.9                                                   |
| Rotation time                 | 1.0 seconds         | 0.8 seconds                | 0.5 seconds               | 0.33 seconds                    | 0.33 seconds                                          |
| kVp/effective mA              | 120 kVp<br>200 mA   | 120 kVp<br>Auto mA 200–335 | Care kV 120 kV<br>120 mAS | Care dose 4D<br>120 kV, 190 mAS | Tube A: 80 kV<br>208 mAS<br>Tube B: 140 kV<br>104 mAS |
| Thick sections                | 4.0 mm              | 2.5 mm                     | 2.0 mm                    | 2.0 mm                          | 2.0 mm                                                |
| Thin sections                 | 1.0 mm              | 1.25 mm                    | 0.75 mm                   | 1.0 mm                          | 0.75 mm                                               |
| Contrast media injection rate | 5 mL/s              | 5 mL/s                     | 5 mL/s                    | 5 mL/s                          | 5 mL/s                                                |
| Contrast media dose           | 1 mL/kg body weight | 1 mL/kg body weight        | 50 mL                     | 80 mL                           | 50 mL                                                 |
